# Supplementary material for: Daily Caffeine Consumption May Increase the Risk of Acute Kidney Injury Related to Platinum-Salt Chemotherapy in Thoracic Cancer Patients: A Translational Study
Source: MDPI journal article supplement (doi:10.3390/nu16060889), 2024-03-19
Supplement: s1 [file s1]

**Supplementary Table S1.** Conversion tables: standard volumes and caffeine containers.

| Evaluation of Quantities: Standardization of Containers        |                                                       |                       |                       |                 |                            |                            |                                    |
|----------------------------------------------------------------|-------------------------------------------------------|-----------------------|-----------------------|-----------------|----------------------------|----------------------------|------------------------------------|
| Containers                                                     | Usual Volumes (mL)                                    |                       |                       |                 | Mean Effective Volume (mL) |                            |                                    |
| Bowl                                                           | 250–350                                               |                       |                       |                 | 300                        |                            |                                    |
| Large cup (tea cup, hot chocolate cup, mug)                    | 200–300                                               |                       |                       |                 | 250                        |                            |                                    |
| Small cup (coffee cup)                                         | 90–120                                                |                       |                       |                 | 100                        |                            |                                    |
| Can                                                            | 330                                                   |                       |                       |                 | 330                        |                            |                                    |
| Tall glass (fruit juice glass)                                 | 250–280                                               |                       |                       |                 | 265                        |                            |                                    |
| Standard glass (mustard glass)                                 | 150–200                                               |                       |                       |                 | 175                        |                            |                                    |
| Vending machine cup                                            | 150–200                                               |                       |                       |                 | 175                        |                            |                                    |
| Sources of Caffeine                                            |                                                       |                       |                       |                 |                            |                            |                                    |
| Food Items                                                     | Average Caffeine Content<br>(mg/100 mL or mg/100 g)   |                       |                       |                 |                            |                            |                                    |
| Decaffeinated coffee                                           | 2                                                     |                       |                       |                 |                            |                            |                                    |
| Instant coffee                                                 | 43                                                    |                       |                       |                 |                            |                            |                                    |
| Filtered coffee                                                | 76                                                    |                       |                       |                 |                            |                            |                                    |
| Espresso                                                       | 133, i.e., 40 mg for one espresso (30 mL)             |                       |                       |                 |                            |                            |                                    |
| Brewed tea                                                     | 26.6                                                  |                       |                       |                 |                            |                            |                                    |
| Iced tea                                                       | 12                                                    |                       |                       |                 |                            |                            |                                    |
| Cola beverages (regular, diet)                                 | 12                                                    |                       |                       |                 |                            |                            |                                    |
| Dark chocolate                                                 | 64.5                                                  |                       |                       |                 |                            |                            |                                    |
| Milk chocolate                                                 | 25                                                    |                       |                       |                 |                            |                            |                                    |
| Caffeine content in Different Containers (in mg per container) |                                                       |                       |                       |                 |                            |                            |                                    |
| Food Items                                                     | Bowl<br>(300 mL)                                      | Large Cup<br>(250 mL) | Small Cup<br>(100 mL) | Can<br>(330 mL) | Tall Glass<br>(265 mL)     | Standard Glass<br>(175 mL) | Venting<br>Machine Cup<br>(175 mL) |
| Decaffeinated coffee                                           | 6                                                     | 5                     | 2                     | /               | 5.3                        | 3.5                        | 3.5                                |
| Instant coffee                                                 | 129                                                   | 107.5                 | 43                    | /               | 114                        | 75.3                       | 75.3                               |
| Filtered coffee                                                | 228                                                   | 190                   | 76                    | /               | 201.4                      | 133                        | 133                                |
| Brewed tea                                                     | 79.8                                                  | 66.5                  | 26.6                  | /               | 70.5                       | 46.6                       | 46.6                               |
| Iced tea                                                       | 36                                                    | 30                    | 12                    | 39.6            | 31.8                       | 21                         | 21                                 |
| Cola beverages                                                 | /                                                     | /                     | /                     | 39.6            | 31.8                       | 21                         | 21                                 |
| Espresso                                                       | 133 mg per 100 mL, i.e., 40 mg per 1 espresso (30 mL) |                       |                       |                 |                            |                            |                                    |
| Other Food Items                                               | 1 square (10 g)                                       |                       |                       | 1 bar (25 g)    |                            |                            |                                    |
| Dark chocolate                                                 | 6.5                                                   |                       |                       | 16              |                            |                            |                                    |
| Milk chocolate                                                 | 2.5                                                   |                       |                       | 6.3             |                            |                            |                                    |
